# Supplementary material for: Simulation of intermediate transport in nanoscale scaffolds for multistep catalytic reactions
Source: Royal Society of Chemistry journal article supplement (doi:10.1039/c7cp00239d), 2017-01-01
Supplement: c7cp00239d1.pdf [file c7cp00239d1.pdf]

## Simulation of Intermediate Transport in Nanoscale Scaffolds for Multistep Catalytic Reactions

Erica Earl and Scott Calabrese Barton

### Supporting Information

#### Domain Size Study

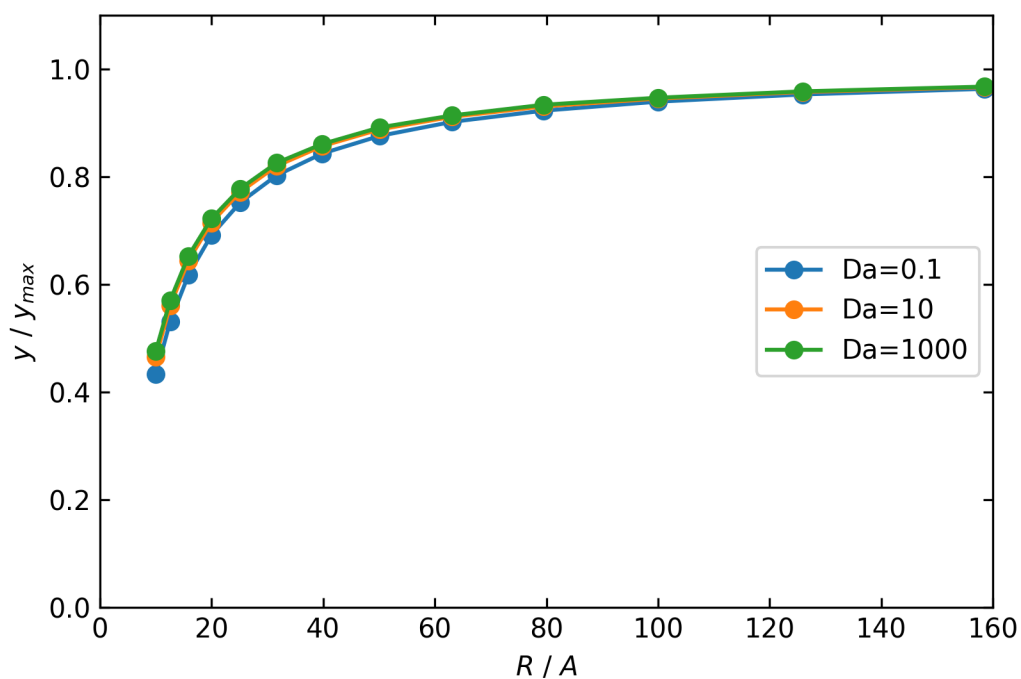

**Figure S1.** Effect of domain size,  $R$ , on simulation results in absence of electrostatic interactions.  $R$  was set to 20 nm for this study, which represents a minimal domain size that does not significantly affect yield. Other parameter values given in Table 1.

## Analysis of Experimental Data for Fig. 11

### Horizontal Axis

To calculate  $\mathbf{Da} = k_2 A / D$ , the heterogeneous rate constant  $k_2$  ( $\text{nm s}^{-1}$ ) was estimated from experimental rate data, and values of  $A$  was assumed to be in the range 0.1–1.0 nm. Unless otherwise noted, the Diffusivity,  $D$ , was assumed to be  $10^{-5} \text{ cm}^2 \text{ s}^{-1}$  or  $10^9 \text{ nm}^2 \text{ s}^{-1}$ .

The heterogeneous rate constant,  $k_2$ , was calculated from a homogeneous first order rate constant,  $k'_2$  ( $\text{s}^{-1}$ ), determined by experiment, using the following conversion:

$$k_2 = \frac{k'_2}{C_{cat}} \frac{10^{24}}{N_A 2\pi A^2}$$

where  $C_{cat}$  ( $\text{mol L}^{-1}$ ) is the catalyst concentration and  $N_A = 6.02 \times 10^{23}$  (molec/mole) is Avogadro's number. The factor  $10^{24}$  accomplishes the volumetric conversion from L to  $\text{nm}^3$ .

### Input Data

| Reference     | $k'_2 / \text{s}^{-1}$ | $C_{cat} / \text{nm}$ | $D / \text{cm}^2 \text{ s}^{-1}$ | $\tau_0 / \text{s}$ | $\tau / \text{s}$ |
|---------------|------------------------|-----------------------|----------------------------------|---------------------|-------------------|
| 6. Trujillo   | 0.031                  | 1.4                   | $10^{-5}$                        | 30                  | $10^a$            |
| 10. Lindbladh | 0.095                  | 79                    | $10^{-5}$                        | 9.5                 | 4.8               |
| 19. Zhang     | 0.012                  | 1                     | $1.7 \times 10^{-5}$             | 137                 | 143               |
| 23. Liu       | $9.5 \times 10^{-3}$   | 7.8                   | $10^{-5}$                        | 105                 | 69                |

<sup>a</sup>Minimum detectable value. Actual value was below detection limit.
